# Supplementary material for: A Rural Road Accident Probability Model Based on Single-Vehicle Hazard Properties including Hazard Color and Mobility: A Driving Simulator Study
Source: Hindawi journal article supplement (doi:10.1155/2020/8826374), 2020-11-19
Supplement: f1 [file 8826374.f1.docx]

## Supplementary Materials

In this part, some detailed descriptions of the participants, variance inflation factors, correlations between the variables in the model and a description of the models’ outcomes, are presented.

Table A-1- Participants’ age classification

| age class | 18 to 20 | 20 to 28 | 28 to 38 | Over 38 |
| --- | --- | --- | --- | --- |
| Percent in age class | 9.2% | 31% | 28.7% | 19.5% |

Including under high school diploma to Ph.D. graduates, the education categories of participants is show in Table 2.

Table A-2 -Participants’ education

| Education level | Under high school diploma | high school diploma | Technician diploma (2years of college) | Bachelor degree | Master degree | PhD |
| --- | --- | --- | --- | --- | --- | --- |
| Percentage | 6.9% | 13.8% | 3.4% | 21.8% | 51.7% | 2.3% |

The participants’ dispersion in regard with sex and marital stage is shown in Table 3. According to this table men and women participated almost equally. Similarly, married drivers constituted about the half of participants.

Table A-3 - Participants’ sex and marital stage

| sex and marital stage | Sex | | marital stage | | Combined sex and marital stage condition | | | |
| --- | --- | --- | --- | --- | --- | --- | --- | --- |
| Female | Male | Married | Single | Single Female | Married Female | Single Male | Married Male |
| Percentage | 49.4% | 50.6% | 50.6% | 49.4% | 21.8% | 27.6% | 23.05% | 27.06% |

Table A-4 - Participants’ driving experience classification

| Driving experience | Novice | Low experience | Relatively experienced | Experienced | Professional driver |
| --- | --- | --- | --- | --- | --- |
| Percentage | 26.40% | 2.30% | 50.60% | 4.60% | 16.10% |

Table A-5 - Variance inflation factors of model variables

| variable | Velocity | Size | day | Mobile | PEN | Green | Green  × day | Yellow | Yellow  × day | Mobile  × Size | Size  × day | average |
| --- | --- | --- | --- | --- | --- | --- | --- | --- | --- | --- | --- | --- |
| VIF | 1.04 | 5.42 | 2.06 | 1.82 | 1.12 | 1.57 | 1.41 | 2.36 | 2.23 | 3.83 | 4.57 | 2.50 |

Table A- 6 - Correlations between variables in model and the error term of the model

| variable | accident | Velocity | Size | day | Mobile | PEN | Green | Green  × day | Yellow | Yellow  × day | Mobile  × Size | Size  × day |
| --- | --- | --- | --- | --- | --- | --- | --- | --- | --- | --- | --- | --- |
| Correlation with error term | 0.9262 | -0.000 | -0.000 | -0.000 | 0.000 | 0.000 | 0.000 | 0.000 | 0.000 | 0.000 | -0.000 | -0.000 |

Table A-7 - Statistical description of estimations of the model

| Model estimations () | Amount | | | | Number | | | | | |
| --- | --- | --- | --- | --- | --- | --- | --- | --- | --- | --- |
| Avg. | se | Max. | Min. | Tot. | < 0 | >1 | >0.5 | Correct predictions | Correct predictions of accident |
| 0.1517 | 0.1353 | 0.5380 | -0.1572 | 1068 | 93 | 0 | 14 | 752 | 128 (out of 162) |
